# Supplementary material
Source: publisher figshare collection journal article supplement (https://acs.figshare.com/ndownloader/files/4580998)
Supplement: Supplementary file 1 [file 4580998]

# Supporting Information

## Functional Nanoparticles from Dendritic Precursors: Hierarchical Assembly in Miniemulsion

Adam L. Sisson,<sup>†</sup> Ilona Papp,<sup>†</sup> Katharina Landfester<sup>‡</sup> and Rainer Haag<sup>†\*</sup>

<sup>†</sup>Department of Chemistry, Free University of Berlin, Takustrasse 3, Berlin 14195, Germany

<sup>‡</sup>Max Planck Institute for Polymer Research, Ackermannweg 10, 55128 Mainz, Germany

Fax: +493083853357; Tel: +493083852633

mail: [haag@chemie.fu-berlin.de](mailto:haag@chemie.fu-berlin.de)

### Preparation of dendritic macromonomers (1, 7 and 8).

$^1\text{H}$  and  $^{13}\text{C}$  NMR spectra were recorded on a Bruker AC 250 (250 MHz; 125 MHz) or on a AMX 500 (500 MHz) instrument. As deuterated solvents,  $(\text{CD}_3)_2\text{CO}$ ,  $\text{CDCl}_3$  were used. Chemical shifts  $\delta$  are given in ppm according to the literature ( $^1\text{H}$ -NMR: acetone:  $\delta = 2.05$  ppm, chloroform:  $\delta = 7.26$  ppm;  $^{13}\text{C}$  NMR: acetone:  $\delta = 29.84$  and  $206.26$  ppm, chloroform:  $\delta = 77.00$  ppm. FT-IR spectra were recorded on a Nicolet Avator 320 FT-IR spectrometer operating from  $4000\text{-}400\text{ cm}^{-1}$  as film on potassium bromide plates from Aldrich. Dialysis was performed in benzoylated cellulose dialyse tubes (SIGMA-ALDRICH,  $(\text{MWCO} = 1000\text{ g mol}^{-1})$ ).

### Hydrophobic alkynyl polyglycerol (1)

**PG<sub>5000</sub>(-OCH<sub>2</sub>C≡CH)<sub>0.8</sub>:** PG<sub>5000</sub> (8.26 g, 109 mmol OH groups) was dissolved in dry DMF (80 ml) and NaH (6.05 g, 240 mmol, 2.2 eq.) was added. After stirring for 3 h at 0 °C to room temperature the mixture was cooled down again to 0 °C and propargylbromide (27.55 g, 185 mmol, 1.7 eq.) was added slowly *via* syringe. The colour of the solution changed to brown and a precipitation was observed. The ice bath was removed and after stirring for 20 hours at room temperature the reaction was quenched with water. Following, extraction with ethyl acetate (3 x 60 ml), the combined organic layers were concentrated *in vacuo* and the crude product was purified by dialysis in chloroform (48 h) to obtain product (1) as a dark brown viscous oil in 80 % yield.

$^1\text{H}$  NMR (500 MHz,  $\text{CDCl}_3$ ):  $\delta = 4.29 - 4.14$  (OCH<sub>2</sub>C≡CH), 3.84 – 3.52 (PG backbone), 2.45 (C≡CH), 1.69 (CH<sub>2</sub>-PG starter unit), 0.80 ppm (CH<sub>3</sub>-PG starter unit).  $^{13}\text{C}$  NMR (500 MHz,  $\text{CDCl}_3$ ):  $\delta = 80.5 - 55.6$  (PG backbone and alkyne groups), 30.3 ppm (C≡CH). IR (KBr):  $\nu = 3441$  ( $\nu\text{-H}_2\text{O}$ ,  $\nu\text{-C}\equiv\text{CH}$ ), 2922 ( $\nu\text{-CH}_3$ ,  $\nu\text{-CH}_2$ ), 2114 ( $\nu\text{-C}\equiv\text{CH}$ ) $\text{cm}^{-1}$ .

### Azidopolyglycerol (7)

The synthesis of azido-terminated polyglycerol (PG) was carried out in a two step protocol. In the first step, hyperbranched polyglycerol was activated to polyglycerol mesylate, in the second step was reacted with sodium azide to give the desired azido-polyglycerol.

**PG<sub>5000</sub>(OMs)<sub>0.80</sub>:** To achieve a loading of 80%, 1.7 eq. (per OH group) of MsCl (25.7 g, 224 mmol) was added dropwise to a cooled solution (0°C) of PG<sub>5000</sub> (10.0 g, 132 mmol OH groups) in abs.

pyridine (80 ml). The reaction mixture was stirred for 22h in the thawing ice bath. After reaction ice was added to obtain a brown honey-like precipitate. The mixture was decanted and the crude product was washed with water (3 x 25 ml). Dialysis in acetone (30 h) yielded a light-brown viscous product. Conversion: quant.; yield: 95%.

$^1\text{H}$  NMR (500 MHz,  $(\text{CD}_3)_2\text{CO}$ ):  $\delta = 5.18 - 4.83$  (functionalised sec. OH groups),  $4.62 - 4.27$  (functionalised prim. OH groups),  $4.01 - 3.52$  (PG backbone),  $3.17$  (Ms- $\text{CH}_3$ ),  $1.28$  ( $\text{CH}_2$ -PG starter unit),  $0.86$  ppm ( $\text{CH}_3$ -PG starter unit).  $^{13}\text{C}$  NMR (500 MHz,  $(\text{CD}_3)_2\text{CO}$ ):  $\delta = 77.7 - 68.0$  (PG backbone),  $37.9 - 36.5$  ppm (Ms-C).

IR (KBr):  $\nu = 3030, 2941, 2361, 1709, 1457, 1362, 1184, 971, 813, 753$   $\text{cm}^{-1}$ .

**PG<sub>5000</sub>(N<sub>3</sub>)<sub>0.8</sub>**: PG<sub>5000</sub>(OMs)<sub>0.8</sub> (5.0 g, 33 mmol OMs groups) and NaN<sub>3</sub> (9.7 g, 149 mmol, 4.6 eq.) were mixed in 50 ml dry DMF and heated at 120°C overnight. After cooling to room temperature the residual NaN<sub>3</sub> was removed via filtration through Celite. The orange filtrate was concentrated *in vacuo* and the crude product was purified by dialysis in chloroform or methanol (48 h) to give a light-brown viscous oil product (**7**). Conversion quant.; yield: 90%, brown viscous oil.

$^1\text{H}$ -NMR (500 MHz,  $\text{CDCl}_3$ ):  $\delta = 3.84 - 3.19$  (PG backbone, functionalised PG groups),  $1.41$  ( $\text{CH}_2$ -PG starter unit),  $0.86$  ppm ( $\text{CH}_3$ -PG starter unit).  $^{13}\text{C}$ -NMR (125 MHz,  $\text{CDCl}_3$ ):  $\delta = 78.6 - 69.7$  (PG backbone),  $60.5$  (functionalised secondary OH groups),  $51.5$  ppm (functionalised primary OH groups). IR (KBr):  $\nu = 3444$  ( $\nu$ -H<sub>2</sub>O),  $2922$  ( $\nu$ -CH<sub>3</sub>,  $\nu$ -CH<sub>2</sub>),  $2102$  ( $\nu$ -N<sub>3</sub>),  $1457, 1273, 1122$   $\text{cm}^{-1}$ .

### Hydrophilic alkynyl polyglycerol (**8**)

**PG<sub>5000</sub>(-OCH<sub>2</sub>C≡CH)<sub>0.3</sub>**: PG<sub>5000</sub> (5.0 g, 66 mmol OH groups) was dissolved in dry DMF (80 ml) and NaH (1.27 g, 53 mmol, 0.8 eq.) was added. After stirring for 3 h at 0 °C to room temperature the mixture was cooled down again to 0 °C and propargylbromide (3.14 g, 26.4 mmol, 0.4 eq.) was added slowly *via* syringe. The colour of the solution changed to amber. The ice bath was removed and after stirring for 20 hours at room temperature the reaction was quenched with water. Following, solvent was removed azeotropically with toluene addition and the crude product was purified by dialysis in methanol (48 h) to obtain a dark brown viscous oil in 85% yield.

$^1\text{H}$  NMR (500 MHz,  $(\text{CD}_3)_2\text{CO}$ ):  $\delta = 5.20 - 4.83$  (functionalised sec. OH groups),  $4.64 - 4.29$  (functionalised prim. OH groups),  $4.01 - 3.53$  (PG backbone),  $3.11$  (Ms- $\text{CH}_3$ ),  $1.28$  ( $\text{CH}_2$ -PG starter unit),  $0.86$  ppm ( $\text{CH}_3$ -PG starter unit).  $^{13}\text{C}$  NMR (500 MHz,  $(\text{CD}_3)_2\text{CO}$ ):  $\delta = 77.0 - 68.2$  (PG

backbone), 37.9 – 36.7 ppm (Ms-C).

IR (KBr):  $\nu = 3033, 2940, 2364, 1711, 1462, 1362, 1181, 970, 813, 758 \text{ cm}^{-1}$ .

### DLS data for nanoparticles (3 - 6, 10 - 12)

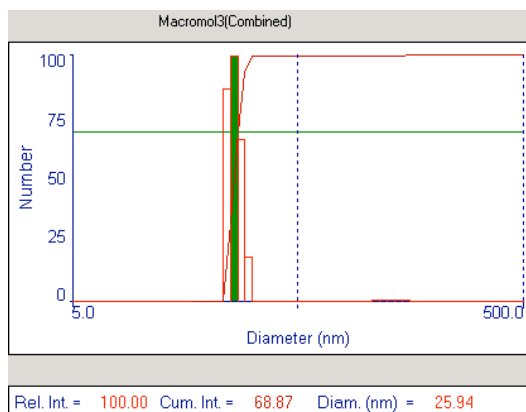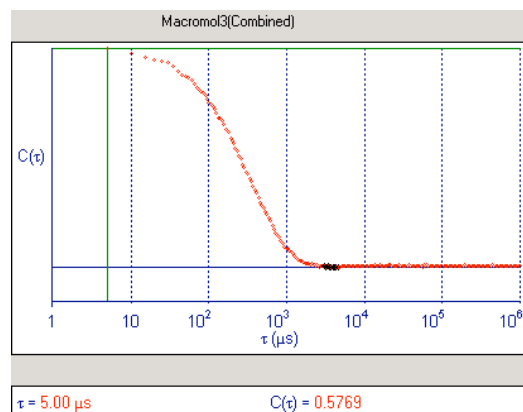

### Product 3 in water

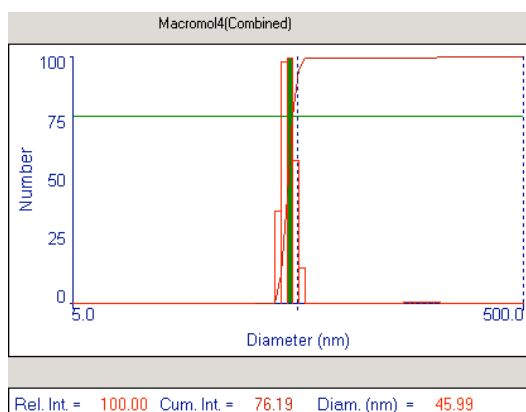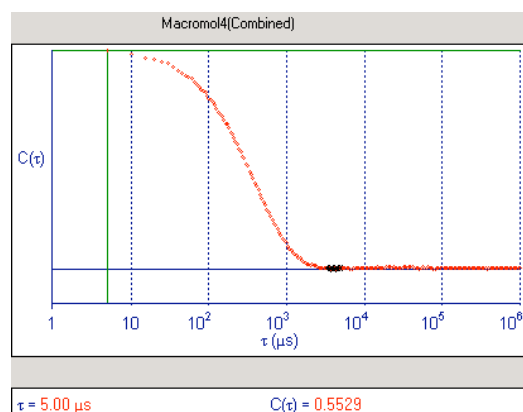

### Product 4 in water

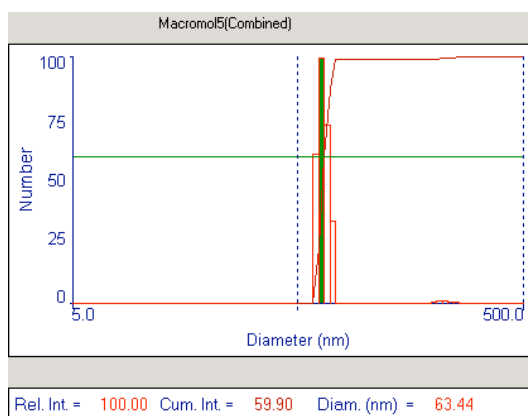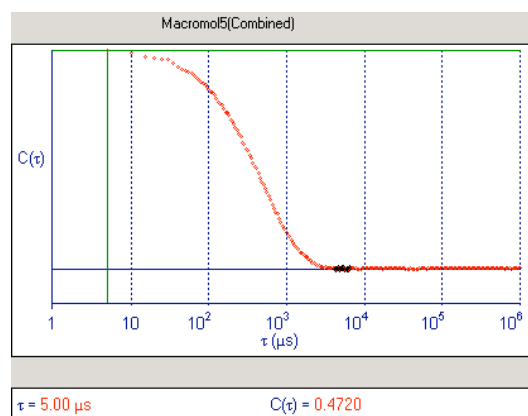

### Product 5 in water

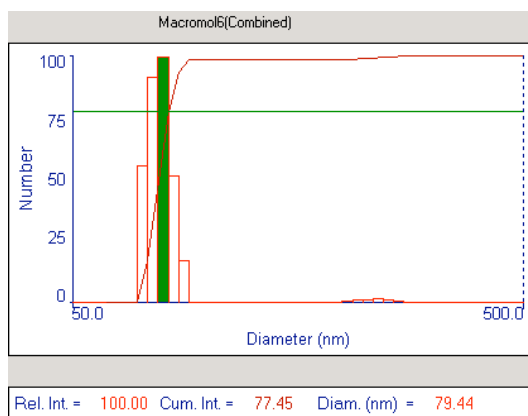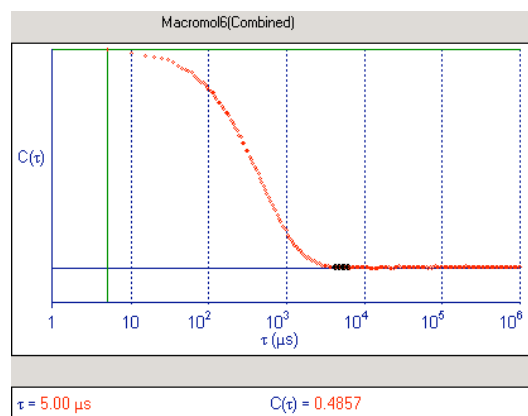

### Product 6 in water

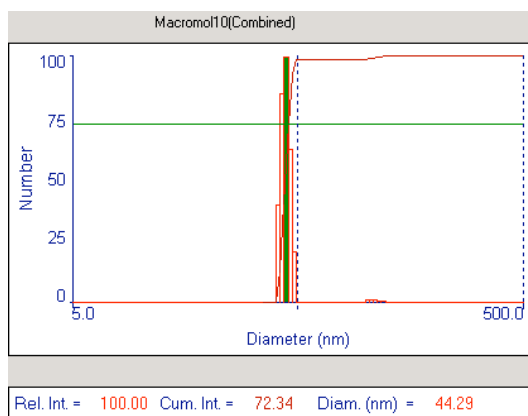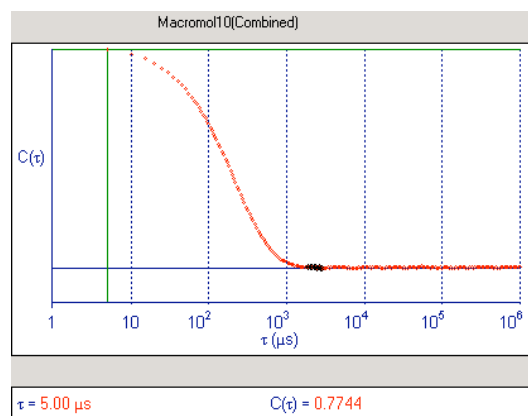

### Product 10 in MeOH

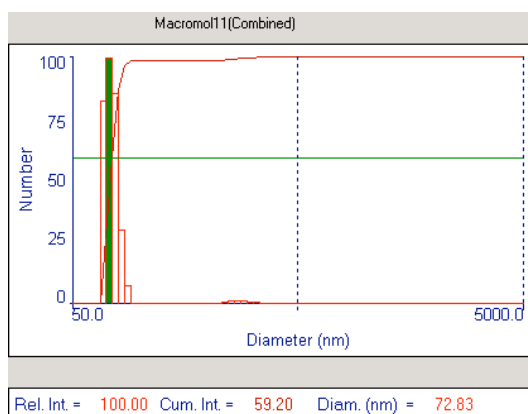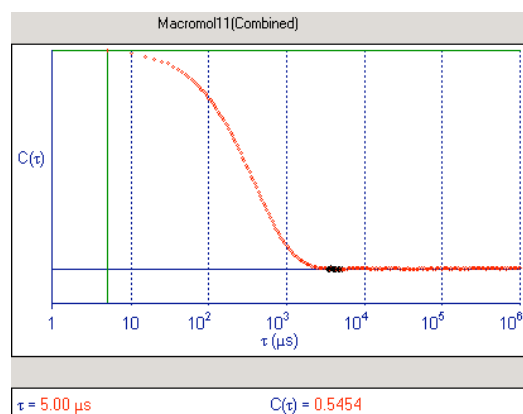

### Product 11 in MeOH

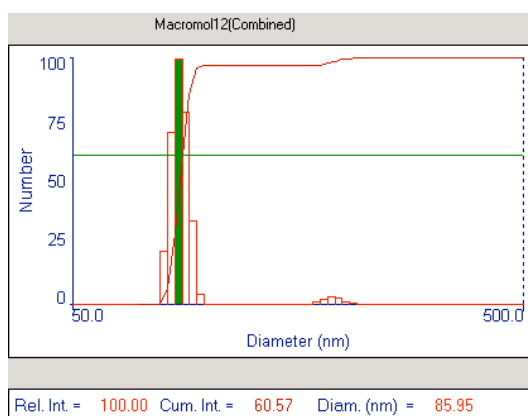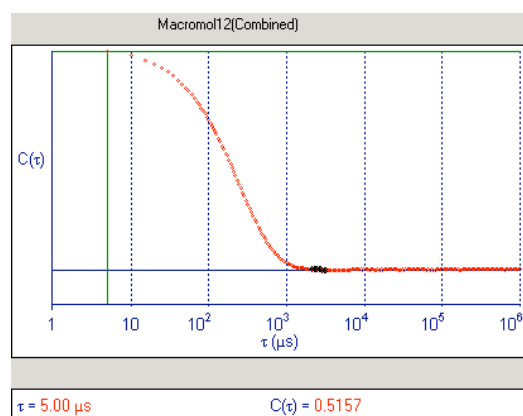

### Product 12 in MeOH

### UV-Vis spectrum of hemicyanine dye labelled nanoparticles (10)

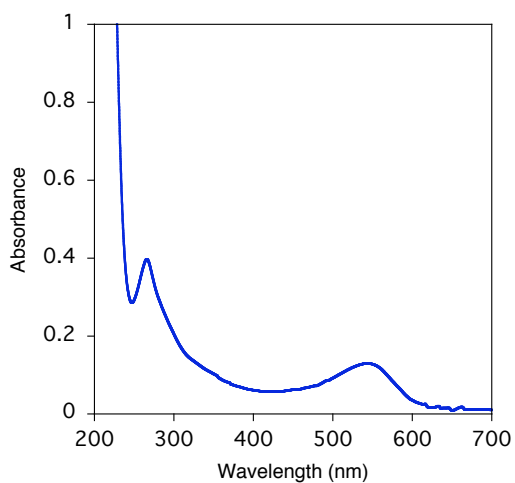

UV-vis spectrum of purified nanoparticles (10) in methanol shows a characteristic absorbance of the conjugated hemicyanine dye (9) in the wavelength region 500 - 600 nm.
